# Supplementary material for: Template-free synthesis of Bi2O2CO3 hierarchical nanotubes self-assembled from ordered nanoplates for promising photocatalytic applications
Source: Royal Society of Chemistry journal article supplement (doi:10.1039/d1cp05952a), 2022-01-01
Supplement: d1cp05952a1.pdf [file d1cp05952a1.pdf]

## Supplementary Materials

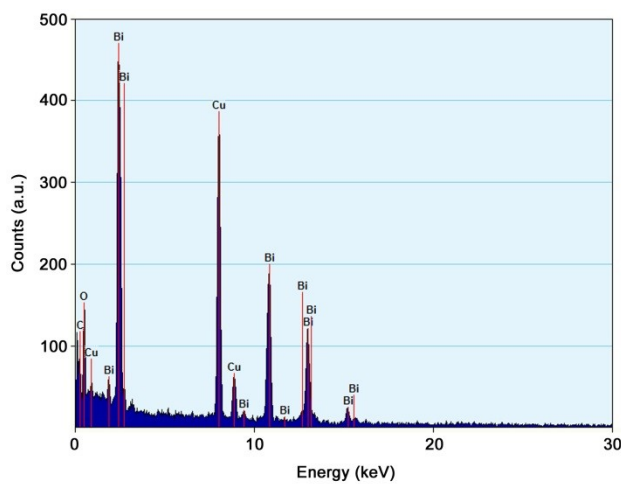

Fig. S1. EDS spectrum of 3h-BOC.

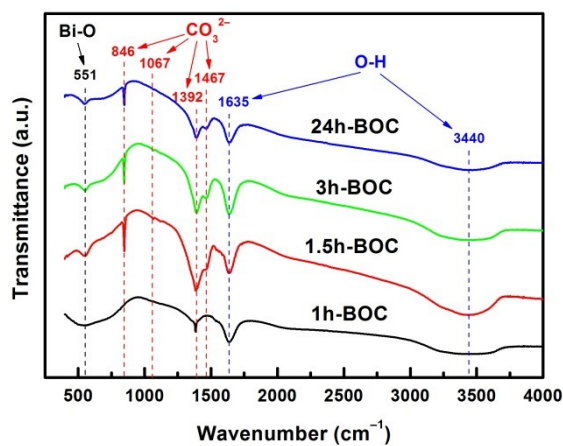

Fig. S2. FTIR spectra of BOC samples derived at different reaction times.

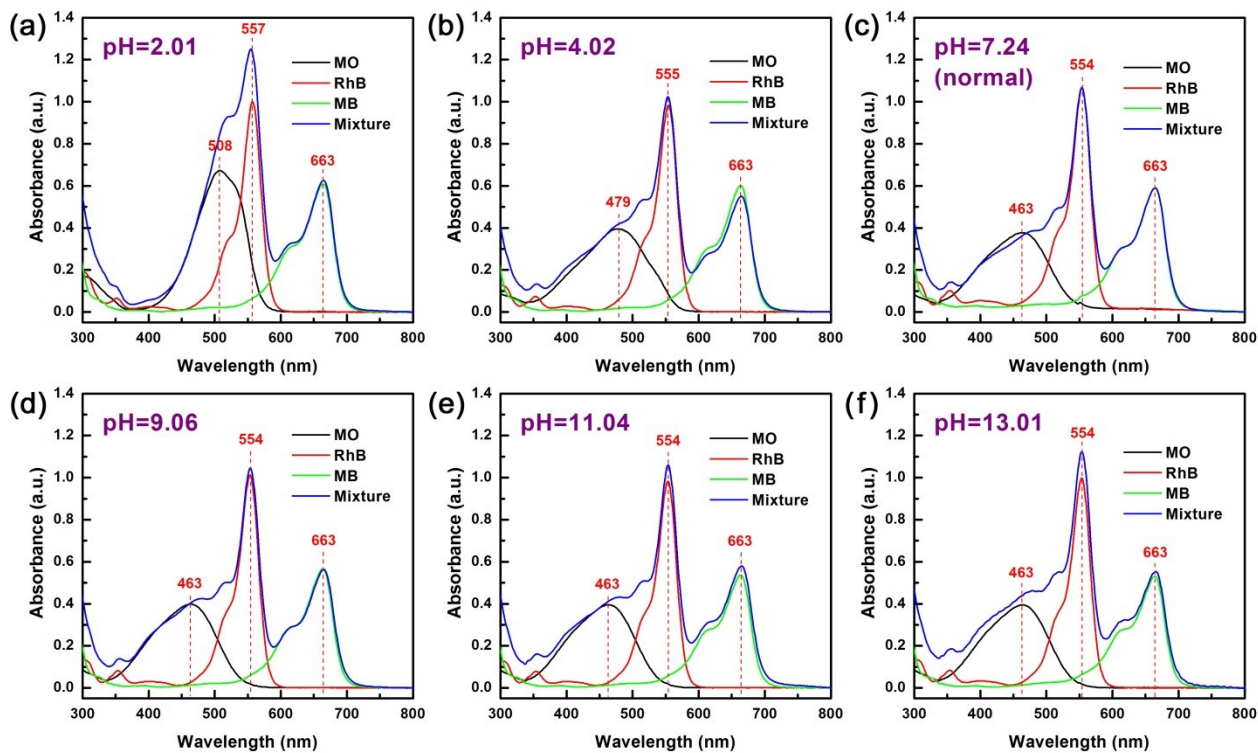

**Fig. S3.** UV-vis absorption spectra of fresh MO, RhB, MB, and MO/RhB/MB mixture solutions at different pH values.
